# Supplementary material for: Ultrastructural visualization of 3D chromatin folding using volume electron microscopy and DNA in situ hybridization
Source: PubMed Central journal article supplement (PMC7195386; doi:10.1038/s41467-020-15987-2), 2020-05-01
Supplement: 41467_2020_15987_MOESM6_ESM.pdf [file 41467_2020_15987_MOESM6_ESM.pdf]

**Title:** SUPPLEMENTARY MOVIE 1.

**Description:** Rotating structure, movie file for sID 50

**Title:** SUPPLEMENTARY MOVIE 2.

**Description:** Rotating structure, movie file for sID 12

**Title:** SUPPLEMENTARY MOVIE 3.

**Description:** Rotating structure, movie file for sID 42
